# Supplementary material
Source: PubMed Central journal article supplement (PMC10448365)
Supplement: jamasurg-e232293-s001.pdf [file jamasurg-e232293-s001.pdf]

## Supplemental Online Content

Gebran A, Thakur SS, Maurer LR, et al. Development of a machine learning–based prescriptive tool to address racial disparities in access to care after penetrating trauma. *JAMA Surg*. Published online August 23, 2023. doi:10.1001/jamasurg.2023.2293

**eFigure.** Complete optimal classification tree using unadjusted data with dotted rectangle delineating portion of the tree represented in Figure 2

**eTable 1.** Variables requiring imputation

**eTable 2.** Relative variable importance from a logistic regression model used to inform weighted severity metric

**eTable 3.** Metrics for the area under the curve (AUC) across the test set for 10 random seeds

This supplemental material has been provided by the authors to give readers additional information about their work.



**eTable 1. Variables requiring imputation**

| <b>Variable</b>            | <b>Number of imputed observations</b> | <b>Percentage of imputed observation</b> |
|----------------------------|---------------------------------------|------------------------------------------|
| Age                        | 121                                   | 0.23%                                    |
| Gender                     | 5                                     | 0.01%                                    |
| Arrived with signs of life | 4,817                                 | 9.18%                                    |
| Systolic blood pressure    | 693                                   | 1.32%                                    |
| Heart rate                 | 661                                   | 1.26%                                    |
| Oxygen Saturation          | 4,229                                 | 8.06%                                    |
| Temperature                | 10,892                                | 20.76%                                   |
| GCS                        | 719                                   | 1.37%                                    |
| Respiratory rate           | 1,243                                 | 2.37%                                    |

Abbreviations: GCS, Glasgow Coma Scale.

**eTable 2. Relative variable importance from a logistic regression model used to inform weighted severity metric**

| <b>Variable</b>        | <b>Importance</b> |
|------------------------|-------------------|
| AIS Spine: 5           | 4.13              |
| AIS Spine: 4           | 3.15              |
| AIS Spine: 3           | 2.71              |
| AIS Head: 5            | 2.28              |
| AIS Head: 4            | 1.25              |
| AIS Face: 3            | 0.85              |
| AIS Face: 4            | 0.69              |
| AIS Head: 3            | 0.57              |
| AIS Neck: 4            | 0.47              |
| AIS Lower Extremity: 3 | 0.28              |

Abbreviations: AIS, Abbreviated Injury Scale.

**eTable 3. Metrics for the area under the curve (AUC) across the test set for 10 random seeds**

| <b>Metrics</b>     | <b>AUC Original Labels</b> | <b>AUC Updated Labels</b> |
|--------------------|----------------------------|---------------------------|
| Mean               | 0.79                       | 0.87                      |
| Standard Deviation | $4.09 \times 10^{-3}$      | $5.40 \times 10^{-3}$     |
| Standard Error     | $1.29 \times 10^{-3}$      | $1.71 \times 10^{-3}$     |

Abbreviations: AUC, Area Under the Curve.
