# Supplementary material
Source: PubMed Central journal article supplement (PMC10448365)
Supplement: jamasurg-e232293-s002.pdf [file jamasurg-e232293-s002.pdf]

## Data Sharing Statement

Gebran. Development of a Machine Learning–Based Prescriptive Tool for Penetrating Trauma and Addressing Racial Disparities in Access to Care. *JAMA Surg*. Published August 23, 2023. doi:10.1001/jamasurg.2023.2293

### Data

**Data available:** Yes

**Data types:** Deidentified participant data, Data dictionary

**How to access data:** The database is publicly available to all participants in the ACS TQIP: <https://www.facs.org/quality-programs/trauma/quality/trauma-quality-improvement-program/level-i-and-ii-tqip/>.

**When available:** With publication

### Supporting Documents

**Document types:** Statistical/analytic code

**How to access documents:** All codes used in the study can be accessed through the following GitHub link: <https://github.com/Sumiran1/TOP-Disposition-Fairness-Adjustment>

**When available:** With publication

### Additional Information

**Who can access the data:** TQIP data is available to all participating hospitals in the ACS-TQIP program Our codes will be available to anyone requesting the codes

**Types of analyses:** For any purpose

**Mechanisms of data availability:** TQIP data is available to all participating hospitals in the ACS-TQIP program
